# Supplementary material
Source: HighWire-hosted journal article supplement (https://jitc.bmj.com/content/12/10/e009877)
Supplement: inline-supplementary-material-1 [file inline-supplementary-material-1.pdf]

## **Supplementary Data**

**AKAP12 positive fibroblast determines immunosuppressive contexture and immunotherapy response in TNBC patients by promoting macrophage M2 polarization**

**The Supplementary Data consist of:**

Supplementary Figures 1-5

Supplementary Tables 1-2

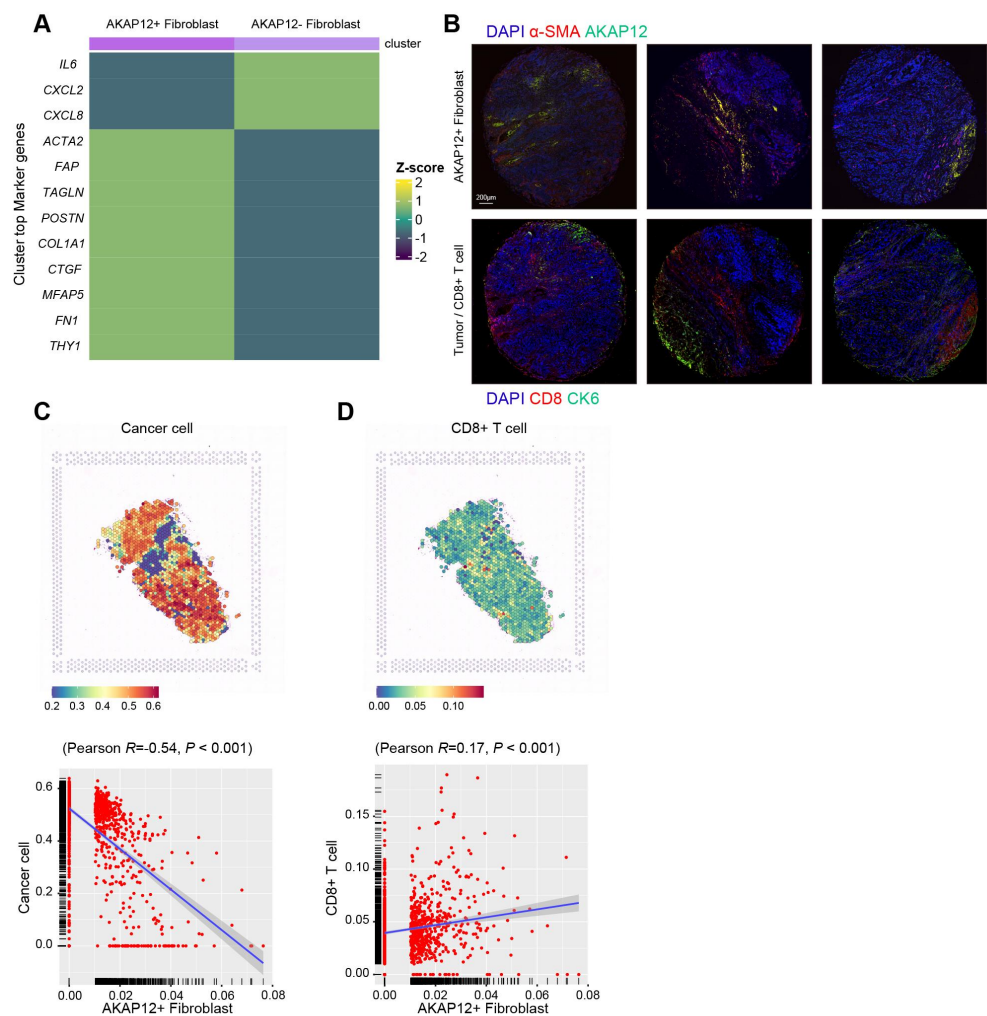

**Supplementary Figure 1.** Identification of a AKAP12<sup>+</sup> fibroblast subset in TNBC.

(A) Heatmap showing the differential gene expression in AKAP12<sup>+</sup> fibroblast and AKAP12<sup>-</sup> fibroblast based on single-cell transcriptomes. (B) Top: Representative images of immunofluorescence co-staining of  $\alpha$ -SMA (red) and AKAP12 (green) in TNBC tissues. Bottom: Representative images of immunofluorescence co-staining of CD8 (red) and CK6 (green) in TNBC tissues. Scale bar, 200  $\mu$ m. (C) Top: Spatial distribution of cancer cell on a representative TNBC tissue section. Bottom: Pearson correlation analysis of proportions of AKAP12<sup>+</sup> fibroblast and cancer cell in TNBC

tissues. (D) Top: Spatial distribution of CD8<sup>+</sup> T cell on a representative TNBC tissue section. Bottom: Pearson correlation analysis of proportions of AKAP12<sup>+</sup> fibroblast and CD8<sup>+</sup> T cell in TNBC tissues.

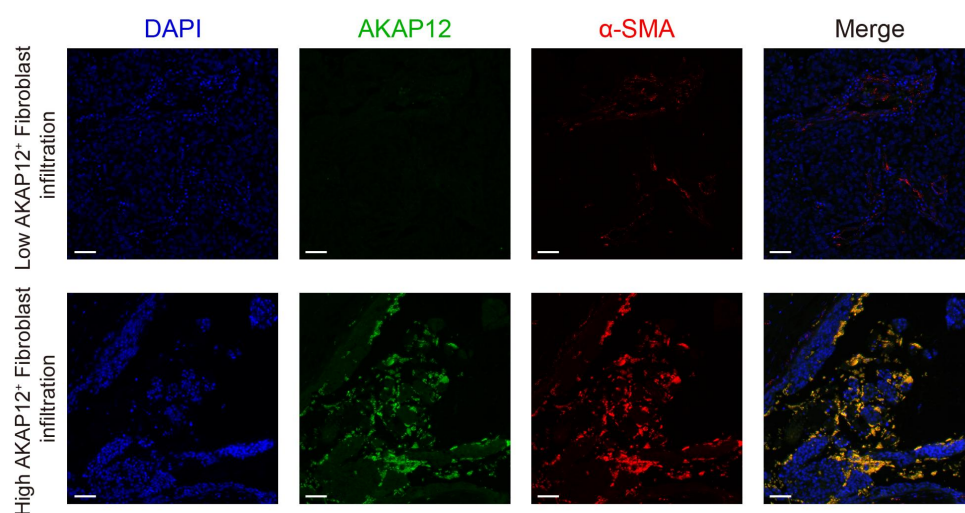

**Supplementary Figure 2.** Representative images of immunofluorescence co-staining of  $\alpha$ -SMA (red) and AKAP12 (green) in mouse orthotopic TNBC tissues from high and low AKAP12<sup>+</sup> fibroblast infiltration groups.

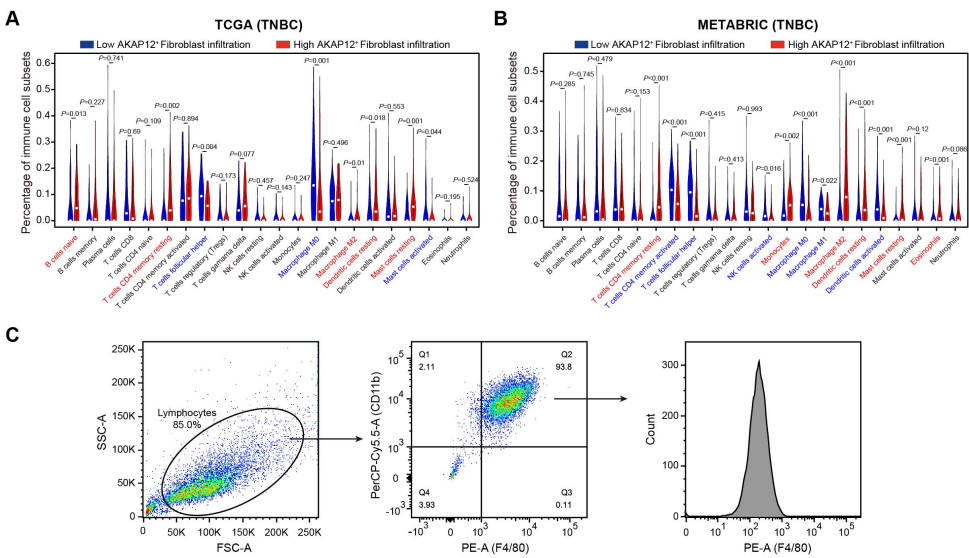

**Supplementary Figure 3.** Intratumoral AKAP12<sup>+</sup> fibroblasts correlate with immunosuppressive tumor microenvironment in TNBC. (A-B) Violin chart of the infiltration percentage of 22 immune cell types calculated using CIBERSORT algorithm in high and low AKAP12<sup>+</sup> fibroblast infiltration groups from TCGA (A) and METABRIC (B) cohorts. Increased and decreased cell subsets in the high AKAP12<sup>+</sup> fibroblast infiltration group compared to the low group are colored by red and blue, respectively. Mann-Whitney U test. (C) Representative example of gating strategy of BMDMs.

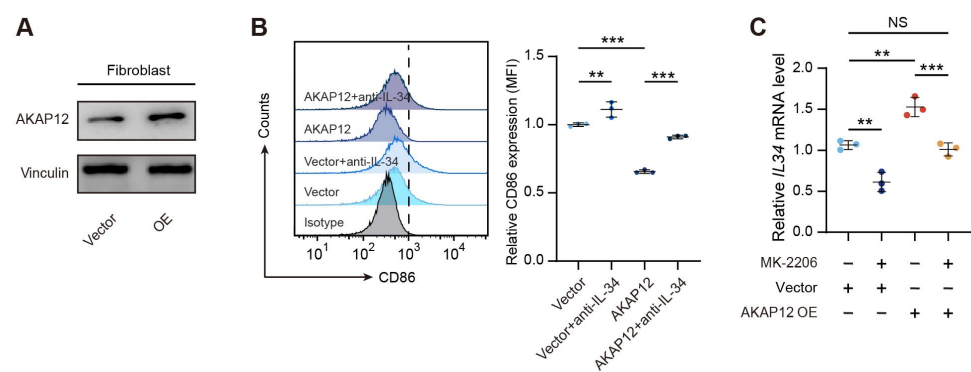

**Supplementary Figure 4.** AKAP12<sup>+</sup> fibroblasts interact with macrophages via IL-34/CSF1R signaling in TNBC. (A) Western blot of AKAP12 level in vector and AKAP12-overexpressing (OE) fibroblasts. (B) Flow cytometry analyses of CD68 expression on THP-1-differentiated macrophages from the indicated groups. (C) qPCR detecting IL-34 expression levels in vector and AKAP12-overexpressing fibroblasts treated with or without MK-2206. \*\*  $P<0.01$ , \*\*\*  $P<0.001$ , and NS, not significant; one-way ANOVA test.

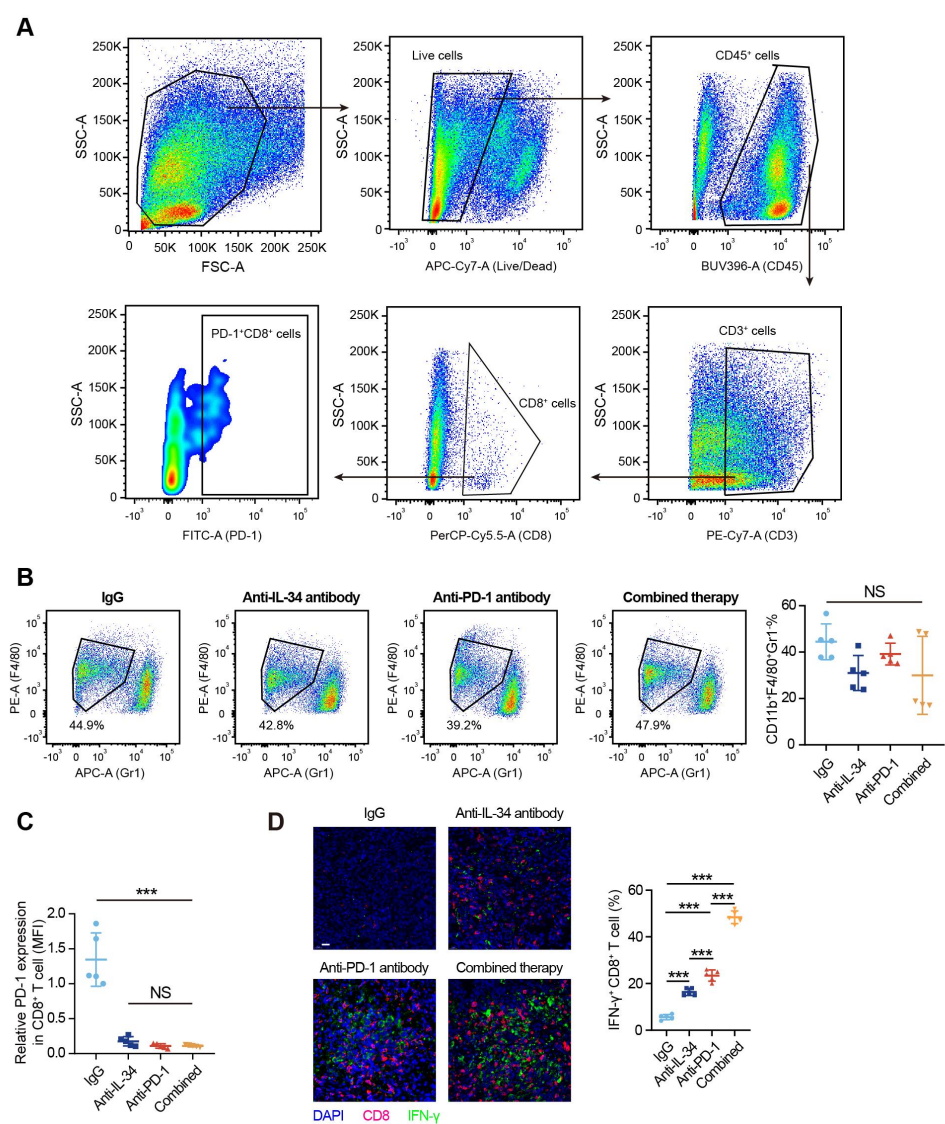

**Supplementary Figure 5.** Pharmacological blockade of the IL-34/CSF1R signaling enhances the efficacy of anti-PD-1 antibody in TNBC. (A) Representative example of the gating strategy of PD-1<sup>+</sup> CD8<sup>+</sup> T cells. (B) Flow cytometry analyses showing the population proportion of CD11b<sup>+</sup>F4/80<sup>+</sup>Gr1<sup>-</sup> total macrophages in each group. (C) Flow cytometry analyses of PD-1 expressions in CD8<sup>+</sup> T cells in each group. (D) Immunofluorescence analyses showing the IFN-γ<sup>+</sup> CD8<sup>+</sup> T cell population in each group. \*\*\*  $P < 0.001$ , and NS, not significant; one-way ANOVA test.

Supplementary tables

**Supplementary Table 1.** The clinicopathologic details of TNBC patients (n=80)

| Variables             | Number      |
|-----------------------|-------------|
| Age(years)            |             |
| ≤ 50                  | 40 (50.0%)  |
| > 50                  | 40 (50.0%)  |
| Gender                |             |
| Female                | 80 (100.0%) |
| Male                  | 0 (0.0%)    |
| TNM stage             |             |
| I+II                  | 51 (63.75%) |
| III+IV                | 29 (36.25%) |
| Tumor differentiation |             |
| G1+G2                 | 9 (11.25%)  |
| G3+G4                 | 71 (88.75%) |

**Supplementary Table 2.** Details of 39 antibodies applied in CyTOF assay

| Label | Marker              | Clone     | Manufacturer |
|-------|---------------------|-----------|--------------|
| 89Y   | CD45                | 30-F11    | BioLegend    |
| 115In | CD3ε                | 145-2C11  | Biolegend    |
| 141Pr | Gr-1(Ly-6G/Ly-6C)   | RB6-8C5   | Biolegend    |
| 142Nd | CD11c               | N418      | Biolegend    |
| 143Nd | CD69                | H1.2F3    | Biolegend    |
| 144Nd | CX3CR1              | SA011F11  | Biolegend    |
| 145Nd | CD24                | M1/69     | Biolegend    |
| 146Nd | CD279(PD-1)         | 29F.1A12  | Biolegend    |
| 147Sm | CD80                | 16-10A1   | Biolegend    |
| 148Nd | Ly-6C               | HK1.4     | Biolegend    |
| 149Sm | CD117(c-kit)        | 2B8       | Biolegend    |
| 150Nd | IgD                 | 11-26c.2a | Biolegend    |
| 151Eu | CD44                | IM7       | Biolegend    |
| 152Sm | CD19                | 6D5       | Biolegend    |
| 153Eu | Siglec-F            | E50-2440  | BD           |
| 154Sm | CD62L               | MEL-14    | Biolegend    |
| 155Gd | CD103               | 2E7       | Biolegend    |
| 156Gd | CD317(BST-2)        | 44E9R     | R&D          |
| 157Gd | FcεRIα              | MAR-1     | Biolegend    |
| 158Gd | MERTK(Mer)          | 2B10C42   | Biolegend    |
| 159Tb | F4/80               | Cl:A3-1   | BioRAD       |
| 160Gd | TCR β chain         | H57-597   | Biolegend    |
| 161Dy | CD49b(pan-NK cells) | DX5       | Biolegend    |
| 162Dy | CD25(IL-2Rα)        | 3C7       | Biolegend    |
| 163Dy | CD45R(B220)         | RA3-6B2   | Biolegend    |
| 164Dy | CD192(CCR2)         | 475301    | RD           |
| 165Ho | FOXP3               | FJK-16s   | eBioscience  |
| 166Er | TCR γ/δ             | GL3       | Biolegend    |
| 167Er | CD206(MMR)          | C068C2    | Biolegend    |
| 168Er | CD64(FcγRI)         | X54-5/7.1 | Biolegend    |
| 169Tm | CD38                | 90        | Biolegend    |
| 171Yb | CD86                | GL-1      | Biolegend    |
| 172Yb | CD127(IL-7Rα)       | A7R34     | Biolegend    |



|       |                        |         |             |
|-------|------------------------|---------|-------------|
| 173Yb | CD172a(SIRP $\alpha$ ) | P84     | Biolegend   |
| 174Yb | CD27                   | LG.3A10 | Biolegend   |
| 175Lu | Ki-67                  | SolA15  | eBioscience |
| 197Au | CD4                    | RM4-5   | Biolegend   |
| 198Pt | CD8a                   | 53-6.7  | Biolegend   |
| 209Bi | CD11b                  | M1/70   | Biolegend   |
